# Supplementary material for: Visual search characteristics of precise map reading by orienteers
Source: PeerJ. 2019 Aug 23;7:e7592. doi: 10.7717/peerj.7592 (PMC6709663; doi:10.7717/peerj.7592)
Supplement: Supplemental Information 1 — Original data shows that: the accuracy of the route planning by the three directional movement project expert control subjects fixation point trajectory 5 scores for accuracy, measurement of each subject’s average score. [file peerj-07-7592-s001.xlsx]

## Sheet: Sheet1
Route planning correctness data
Different subjects	Simple map	Complex map
1	5	4
1	4.98	3.7
1	4.48	4.1
1	5	4
1	5	4
1	4.47	4.47
1	4	3
1	4	4
1	5	3
1	4	4
1	5	3.9
1	5	4
1	4.73	3
1	4.5	3
1	4.8	3.8
1	4.55	4.05
2	4.8	4
2	4	4
2	5	3.7
2	4.59	4.59
2	4.34	4.34
2	5	4.54
2	5	4.29
2	5	5
2	5	4.58
2	4	3.9
2	5	4.46
2	5	4.2
2	4.12	4.12
2	5	5
2	5	5
2	5	5
3	5	4.2
3	5	4.36
3	5	5
3	5	4
3	5	5
3	5	5
3	5	5
3	5	5
3	5	5
3	4	4
3	5	4.7
3	4.8	4.5
